# Supplementary material for: Enhanced proteasomal activity is essential for long term survival and recurrence of innately radiation resistant residual glioblastoma cells
Source: PubMed Central journal article supplement (PMC6021241; doi:10.18632/oncotarget.25351), 2018-06-12
Supplement: oncotarget-09-27667-s001.pdf [file oncotarget-09-27667-s001.pdf]

# Enhanced proteasomal activity is essential for long term survival and recurrence of innately radiation resistant residual glioblastoma cells

## SUPPLEMENTARY MATERIALS

| GeneName | Protein Name                                             | Relative Peptide Intensities in RR | Ub Position Glycyl lysine isopeptide | References                                    |
|----------|----------------------------------------------------------|------------------------------------|--------------------------------------|-----------------------------------------------|
| APP      | Amyloid beta A4 protein                                  | 0.191                              | 763                                  |                                               |
| HIST1H1B | Histone H1.5 (Histone H1a) (Histone H1b) (Histone H1s-3) | 0.475                              | 17                                   |                                               |
| HIST1H1B | Histone H1.5 (Histone H1a) (Histone H1b) (Histone H1s-3) | 0.475                              | 219                                  |                                               |
| HIST1H4A | Histone H4                                               | 0.477                              | 13                                   |                                               |
| HIST1H4A | Histone H4                                               | 0.477                              | 92                                   |                                               |
| KDM1A    | lysine-specific histone demethylase 1A isoform b         | 0.478                              | 503                                  | Han X et al, Mol Cell. 2014 Aug               |
| PEF1     | peflin                                                   | 0.508                              | 137                                  | McGourty CA et al, Cell. 2016 Oct             |
| PPIA     | peptidyl-prolyl cis-trans isomerase A                    | 0.570                              | 28                                   | Visvikis O et al, FEBS J. 2008 Jan            |
| RAC1     | ras-related C3 botulinum toxin substrate 1 isoform Rac1  | 0.581                              | 147                                  |                                               |
| RAN      | GTP-binding nuclear protein Ran                          | 0.601                              | 71                                   |                                               |
| RBBP7    | histone-binding protein RBBP7 isoform 2                  | 0.602                              | 4                                    |                                               |
| RBBP7    | histone-binding protein RBBP7 isoform 2                  | 0.605                              | 159                                  |                                               |
| RPL10    | 60S ribosomal protein L10 isoform a                      | 0.605                              | 188                                  |                                               |
| RPS10    | 40S ribosomal protein S10                                | 0.619                              | 138                                  | Sundaramoorthy E et al, Mol Cell. 2017 Feb 16 |
| RPS10    | 40S ribosomal protein S10                                | 0.626                              | 139                                  | Sundaramoorthy E et al, Mol Cell. 2017 Feb 16 |
| TCEA1    | transcription elongation factor A protein 1 isoform 1    | 0.626                              | 55                                   |                                               |
| TDRKH    | tudor and KH domain-containing protein isoform a         | 0.672                              | 65                                   | Cunningham et al, Nature Cell Biology 2015    |
| TDRKH    | tudor and KH domain-containing protein isoform a         | 0.672                              | 76                                   | Cunningham et al, Nature Cell Biology 2015    |
| TDRKH    | tudor and KH domain-containing protein isoform a         | 0.672                              | 110                                  | Cunningham et al, Nature Cell Biology 2015    |
| TDRKH    | tudor and KH domain-containing protein isoform a         | 0.672                              | 112                                  | Cunningham et al, Nature Cell Biology 2015    |
| TDRKH    | tudor and KH domain-containing protein isoform a         | 0.672                              | 152                                  | Cunningham et al, Nature Cell Biology 2015    |
| TDRKH    | tudor and KH domain-containing protein isoform a         | 0.672                              | 175                                  | Cunningham et al, Nature Cell Biology 2015    |
| TDRKH    | tudor and KH domain-containing protein isoform a         | 0.672                              | 181                                  | Cunningham et al, Nature Cell Biology 2015    |
| TDRKH    | tudor and KH domain-containing protein isoform a         | 0.672                              | 187                                  | Cunningham et al, Nature Cell Biology 2015    |
| TDRKH    | tudor and KH domain-containing protein isoform a         | 0.672                              | 193                                  | Cunningham et al, Nature Cell Biology 2015    |
| TDRKH    | tudor and KH domain-containing protein isoform a         | 0.672                              | 256                                  | Cunningham et al, Nature Cell Biology 2015    |
| TDRKH    | tudor and KH domain-containing protein isoform a         | 0.672                              | 267                                  | Cunningham et al, Nature Cell Biology 2015    |
| TDRKH    | tudor and KH domain-containing protein isoform a         | 0.672                              | 479                                  | Cunningham et al, Nature Cell Biology 2015    |
| TDRKH    | tudor and KH domain-containing protein isoform a         | 0.672                              | 510                                  | Cunningham et al, Nature Cell Biology 2015    |
| TDRKH    | tudor and KH domain-containing protein isoform a         | 0.672                              | 529                                  | Cunningham et al, Nature Cell Biology 2015    |
| UBE2T    | ubiquitin-conjugating enzyme E2 T                        | 0.685                              | 91                                   | Alpi AF1 et al, Mol Cell. 2008 Dec 26         |
| UBE2T    | ubiquitin-conjugating enzyme E2 T                        | 0.685                              | 182                                  | Alpi AF1 et al, Mol Cell. 2008 Dec 26         |

**Supplementary Figure 1: Downregulated proteasome target proteins.** List of downregulated proteins with ubiquitin binding lysine residues.

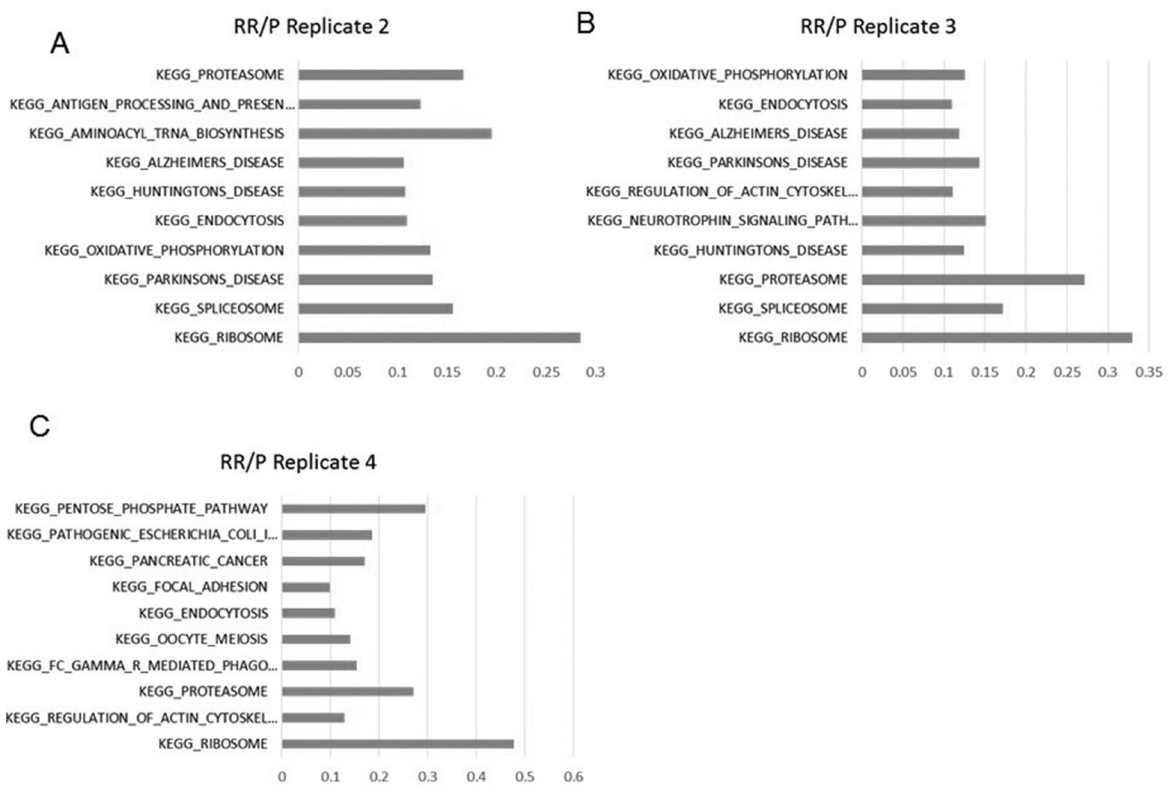

**Supplementary Figure 2: Pathway analysis of deregulated proteins in all the biological replicates.** (A) Pathway analysis of deregulated proteins in replicate 2. (B) Pathway analysis of deregulated proteins in replicate 3. (C) Pathway analysis of deregulated proteins in replicate 4.
